# Supplementary material
Source: Royal Society of Chemistry journal article supplement (doi:10.1039/d6bm00266h)
Supplement: d6bm00266h1.pdf [file d6bm00266h1.pdf]

**Supplementary Material**

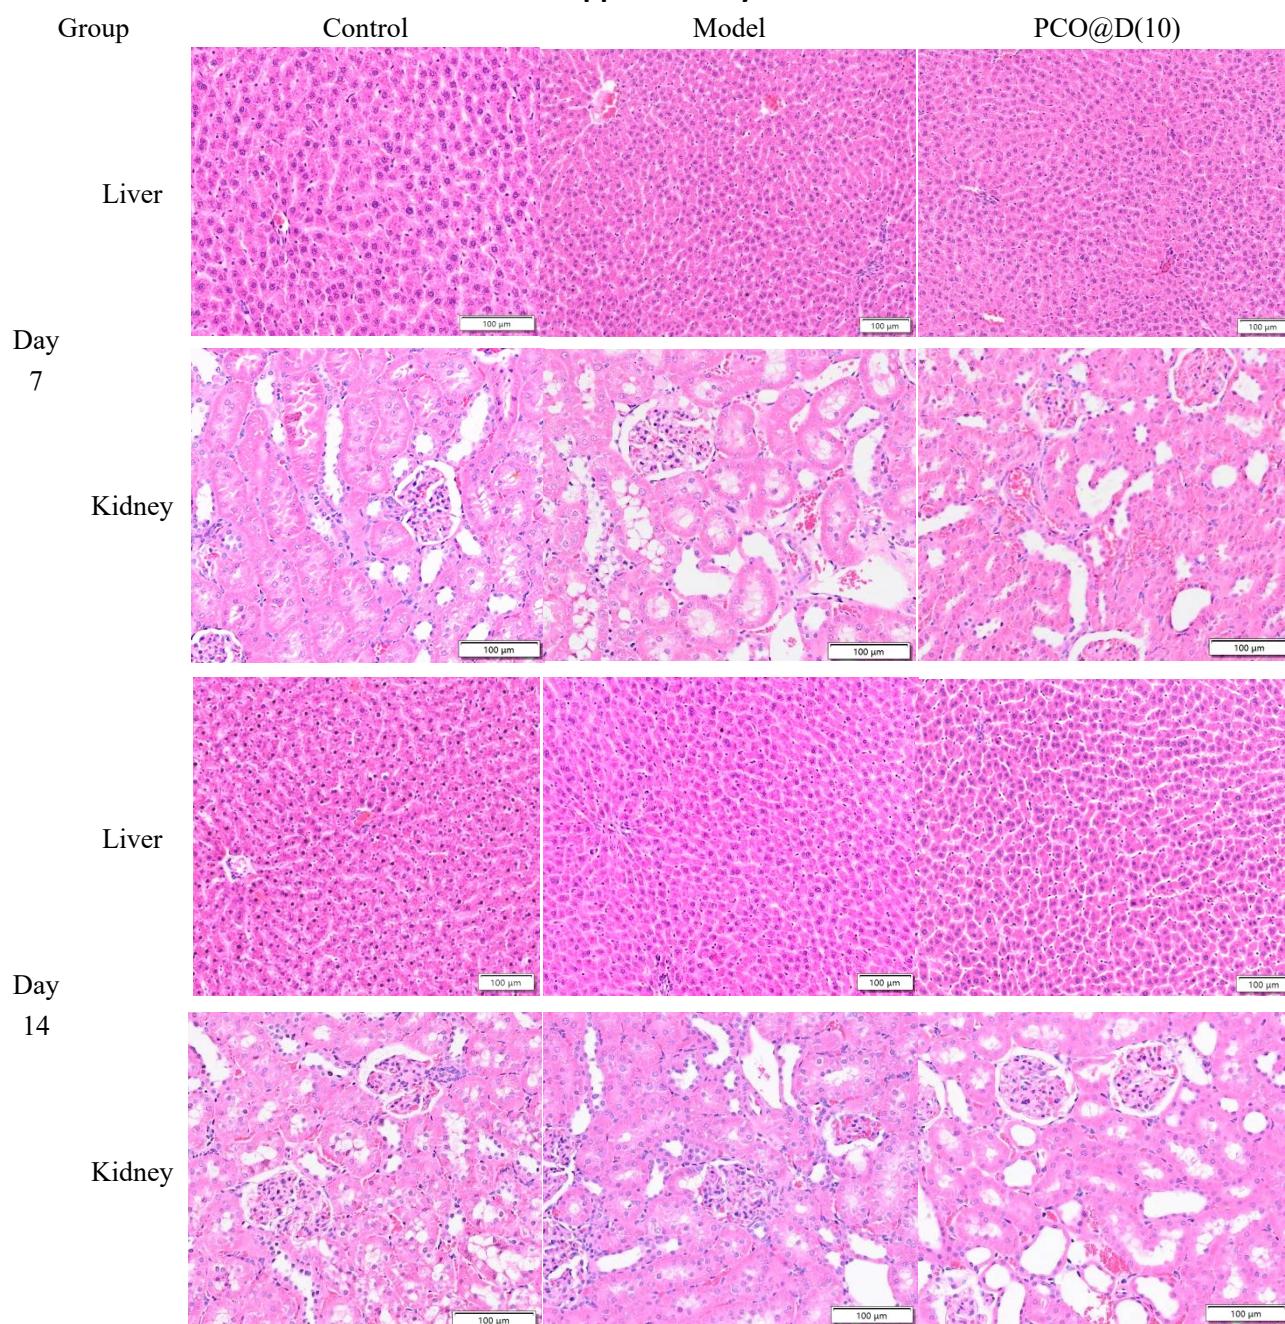

Figure S1. Effects of the PCO@D(10) membrane on rat liver and kidney at days 7 and 14 post-treatment.
